# Supplementary material for: Evaluating the Impact of Adaptive Personalized Goal Setting on Engagement Levels of Government Staff With a Gamified mHealth Tool: Results From a 2-Month Randomized Controlled Trial
Source: PubMed Central journal article supplement (PMC9015741; doi:10.2196/28801), 2022-03-31
Supplement: mhealth_v10i3e28801_app1.pdf [file mhealth_v10i3e28801_app1.pdf]

# Evaluation of the health promotion program 'Beweeg & Scoor'

## Personal information

1. What is your email address?
2. Which municipality / organization do you work for?
  - Brasschaat
  - Essen
  - Kapellen
  - Schoten
  - Stabroek
  - Wuustwezel
3. Which department do you work for?
4. What is your gender?
  - Male
  - Female
  - Undisclosed
5. What is your age?
  - 00 - 20 years old
  - 21 - 30 years old
  - 31 - 40 years old
  - 41 - 50 years old
  - 51 - 60 years old
  - 61 - 70 years old
  - 71 - 99 years old

## Activities & virtual points

6. I enjoyed the activities that were awarded virtual points in GameBus.
  - Strongly agree
  - Agree
  - Neutral
  - Disagree
  - Strongly disagree
7. I was able to perform the activities that were awarded virtual points in GameBus.
  - Strongly agree
  - Agree
  - Neutral
  - Disagree
  - Strongly disagree
8. The number of virtual points that were awarded in GameBus for performing different activities was evenly distributed.
  - Strongly agree
  - Agree

- Neutral
  - Disagree
  - Strongly disagree
9. I believe that my colleagues did not cheat.
- Strongly agree
  - Agree
  - Neutral
  - Disagree
  - Strongly disagree
10. I felt that the activities that were awarded virtual points in GameBus were at my level.
- Strongly agree
  - Agree
  - Neutral
  - Disagree
  - Strongly disagree
11. Throughout the campaign I felt especially related to my colleagues.
- Strongly agree
  - Agree
  - Neutral
  - Disagree
  - Strongly disagree

## Health impact

12. I went for a **walk** more often than usual due to the Beweeg & Scoor program.
- Strongly agree
  - Agree
  - Neutral
  - Disagree
  - Strongly disagree
13. I went for a **bike ride** more often than usual due to the Beweeg & Scoor program.
- Strongly agree
  - Agree
  - Neutral
  - Disagree
  - Strongly disagree
14. I engaged in **sports sessions** more often than usual due to the Beweeg & Scoor program.
- Strongly agree
  - Agree
  - Neutral
  - Disagree
  - Strongly disagree
15. I have been in touch with colleagues more often than usual due to the Beweeg & Scoor program.

- Strongly agree
- Agree
- Neutral
- Disagree
- Strongly disagree

#### Automatic registration of activities

16. Were you aware of the possibility to have GameBus automatically record your physical activities for you?
- Yes → Go to question 17
  - No → Go to question 19
17. Have you used the option to have GameBus automatically record your physical activities for you?
- Yes → Go to question 19
  - No → Go to question 18
18. Why didn't you take advantage of the option to have GameBus automatically record activities for you?

#### Communication & Rewards

19. Via what communication channels were you informed about the Beweeg & Scoor program?
20. I find communication on the that the Beweeg & Scoor program clear.
- Strongly agree
  - Agree
  - Neutral
  - Disagree
  - Strongly disagree
21. Did you have the opportunity to win prizes throughout the Beweeg & Scoor program?
- Yes → Go to question 22
  - No → Go to question 24
22. What prizes could you have won?
23. Have you won one or more prizes?
- Yes → Go to question 24
  - No → Go to question 25
24. What prizes did you win?

#### Personality traits

How much do you agree with each statement about you as you generally are now, not as you wish to be in the future?

25. I am the life of the party.
- Strongly agree
  - Agree
  - Neutral
  - Disagree

- Strongly disagree
26. I sympathize with others' feelings.
- Strongly agree
  - Agree
  - Neutral
  - Disagree
  - Strongly disagree
27. I get chores done right away.
- Strongly agree
  - Agree
  - Neutral
  - Disagree
  - Strongly disagree
28. I have frequent mood swings.
- Strongly agree
  - Agree
  - Neutral
  - Disagree
  - Strongly disagree
29. I have a vivid imagination.
- Strongly agree
  - Agree
  - Neutral
  - Disagree
  - Strongly disagree
30. I don't talk a lot.
- Strongly agree
  - Agree
  - Neutral
  - Disagree
  - Strongly disagree
31. I am not interested in other people's problems.
- Strongly agree
  - Agree
  - Neutral
  - Disagree
  - Strongly disagree
32. I often forget to put things back in their proper place.
- Strongly agree
  - Agree
  - Neutral
  - Disagree
  - Strongly disagree
33. I am relaxed most of the time.
- Strongly agree
  - Agree
  - Neutral

- Disagree
  - Strongly disagree
34. I am not interested in abstract ideas.
- Strongly agree
  - Agree
  - Neutral
  - Disagree
  - Strongly disagree
35. I talk to a lot of different people at parties.
- Strongly agree
  - Agree
  - Neutral
  - Disagree
  - Strongly disagree
36. I feel others' emotions
- Strongly agree
  - Agree
  - Neutral
  - Disagree
  - Strongly disagree
37. I like order.
- Strongly agree
  - Agree
  - Neutral
  - Disagree
  - Strongly disagree
38. I get upset easily.
- Strongly agree
  - Agree
  - Neutral
  - Disagree
  - Strongly disagree
39. I have difficulty understanding abstract ideas.
- Strongly agree
  - Agree
  - Neutral
  - Disagree
  - Strongly disagree
40. I keep in the background.
- Strongly agree
  - Agree
  - Neutral
  - Disagree
  - Strongly disagree
41. I am not really interested in others.
- Strongly agree
  - Agree

- Neutral
  - Disagree
  - Strongly disagree
42. I make a mess of things.
- Strongly agree
  - Agree
  - Neutral
  - Disagree
  - Strongly disagree
43. I seldom feel blue.
- Strongly agree
  - Agree
  - Neutral
  - Disagree
  - Strongly disagree
44. I do not have a good imagination.
- Strongly agree
  - Agree
  - Neutral
  - Disagree
  - Strongly disagree

#### Other feedback and future outlook

45. How likely are you to recommend the GameBus app to a colleague?
- 01
  - 02
  - 03
  - 04
  - 05
  - 06
  - 07
  - 08
  - 09
  - 10
46. What experience (either positive and/or negative) with the Beweeg & Scoor program would you like to share?
47. May we contact you in response to your answers?
- Yes
  - No
48. In what physical activity do you currently engage, and where?
49. What are your future physical activity goals?
50. What support may your employer offer to accommodate your physical activity goals?
