# Supplementary material for: Evaluating the Impact of Adaptive Personalized Goal Setting on Engagement Levels of Government Staff With a Gamified mHealth Tool: Results From a 2-Month Randomized Controlled Trial
Source: PubMed Central journal article supplement (PMC9015741; doi:10.2196/28801), 2022-03-31
Supplement: mhealth_v10i3e28801_app2.pdf [file mhealth_v10i3e28801_app2.pdf]

## Detailed output of statistical analysis

### S1

*dropouts ~ wave + treatment*

| Predictor           | Estimate | Std. error | T-value | P-value |
|---------------------|----------|------------|---------|---------|
| (intercept)         | 10.625   | 3.272      | 3.248   | 0.048   |
| wave = first        | 16.000   | 4.138      | 3.866   | 0.031   |
| wave = second       | 7.500    | 4.138      | 1.812   | 0.168   |
| wave = third        | 0.000    | 4.138      | 0.000   | 1.000   |
| treatment = control | -0.250   | 2.926      | -0.085  | 0.937   |

### S2

*ln(days online) ~ relwave + goal + (1 | user) + (1 | organization)*

| Random effect | Name        | Variance | Std. dev. |
|---------------|-------------|----------|-----------|
| user          | (intercept) | 0.477    | 0.690     |
| organization  | (intercept) | 0.037    | 0.191     |
| residual      |             | 0.326    | 0.571     |

| Fixed effect    | Estimate | Std. error | DF      | T-value | P-value  |
|-----------------|----------|------------|---------|---------|----------|
| (intercept)     | 0.999    | 0.170      | 9.503   | 5.873   | < 0.001  |
| rel. wave       | -0.161   | 0.038      | 172.208 | -4.227  | < 0.0001 |
| goal = maintain | 0.778    | 0.221      | 95.003  | 3.519   | < 0.001  |
| goal = improve  | 0.486    | 0.171      | 101.351 | 2.839   | 0.005    |

### S3

*√activities ~ relwave + goal + (1 | user) + (1 | organization)*

| Random effect | Name        | Variance | Std. dev. |
|---------------|-------------|----------|-----------|
| user          | (intercept) | 3.577    | 1.891     |
| organization  | (intercept) | 0.043    | 0.208     |
| residual      |             | 1.320    | 1.149     |

| Fixed effect    | Estimate | Std. error | DF      | T-value | P-value  |
|-----------------|----------|------------|---------|---------|----------|
| (intercept)     | 2.132    | 0.365      | 9.503   | 6.433   | < 0.001  |
| relwave         | -0.283   | 0.078      | 172.208 | 164.723 | < 0.001  |
| goal = maintain | 1.239    | 0.569      | 95.003  | 98.714  | 0.032    |
| goal = improve  | 1.805    | 0.437      | 101.351 | 103.449 | < 0.0001 |

## S4

*longer walks ~ goal + (1 | user) + (1 | organization)*

| Random effect | Name        | Variance | Std. dev. |
|---------------|-------------|----------|-----------|
| user          | (intercept) | 2.208    | 1.486     |
| organization  | (intercept) | 0.214    | 0.462     |
| residual      |             | 0.026    | 0.161     |

| Fixed effect    | Estimate | Std. error | DF      | T-value | P-value |
|-----------------|----------|------------|---------|---------|---------|
| (intercept)     | 0.066    | 0.312      | 11.517  | 0.213   | 0.835   |
| goal = maintain | 0.261    | 0.412      | 105.446 | 0.633   | 0.528   |
| goal = improve  | 0.917    | 0.312      | 105.282 | 2.934   | 0.004   |

## S5

*sports sessions ~ treatment + goal + (1 | user) + (1 | organization)*

| Random effect | Name        | Variance | Std. dev. |
|---------------|-------------|----------|-----------|
| user          | (intercept) | 0.524    | 0.724     |
| organization  | (intercept) | 0.007    | 0.081     |
| residual      |             | 0.008    | 0.090     |

| Fixed effect             | Estimate | Std. error | DF      | T-value | P-value |
|--------------------------|----------|------------|---------|---------|---------|
| (intercept)              | -0.050   | 0.147      | 24.562  | -0.342  | 0.735   |
| treatment = personalized | 0.276    | 0.141      | 107.117 | 1.955   | 0.053   |
| goal = maintain          | 0.405    | 0.200      | 103.560 | 2.020   | 0.046   |
| goal = improve           | 0.318    | 0.154      | 103.512 | 2.063   | 0.042   |

## S6

*√bike performance ~ treatment*

| Predictor                | Estimate | Std. error | T-value | P-value  |
|--------------------------|----------|------------|---------|----------|
| (intercept)              | 1.682    | 0.070      | 23.970  | < 0.0001 |
| treatment = personalized | 0.217    | 0.102      | 2.131   | 0.040    |

S7

*sports performance ~ treatment · goal*

| Predictor                                     | Estimate | Std. error | T-value | P-value  |
|-----------------------------------------------|----------|------------|---------|----------|
| (intercept)                                   | 3.500    | 0.486      | 7.208   | < 0.0001 |
| treatment = personalized                      | 0.500    | 0.687      | 0.728   | 0.472    |
| goal = maintain                               | -1.250   | 0.687      | -1.820  | 0.039    |
| goal = improve                                | 0.250    | 0.561      | 0.446   | 0.039    |
| treatment = personalized<br>& goal = maintain | 1.250    | 1.011      | 1.237   | 0.037    |
| treatment = personalized<br>& goal = improve  | -0.978   | 0.798      | -1.225  | 0.037    |

S8

*perceived capability ~ number of waves online*

| Predictor              | Estimate | Std. error | T-value | P-value  |
|------------------------|----------|------------|---------|----------|
| (intercept)            | 3.937    | 0.384      | 10.265  | < 0.0001 |
| number of waves online | -0.329   | 0.095      | -3.452  | 0.001    |
