# Supplementary material for: Evaluating the Impact of Adaptive Personalized Goal Setting on Engagement Levels of Government Staff With a Gamified mHealth Tool: Results From a 2-Month Randomized Controlled Trial
Source: PubMed Central journal article supplement (PMC9015741; doi:10.2196/28801), 2022-03-31
Supplement: mhealth_v10i3e28801_app3.pdf [file mhealth_v10i3e28801_app3.pdf]

| Municipality     | Treatment    | Participants | Short walks | Longer walks | Short bike rides | Longer bike rides | Sports sessions | Other | Total |
|------------------|--------------|--------------|-------------|--------------|------------------|-------------------|-----------------|-------|-------|
| Brasschaat       | Control      | 7            | 5           | 0            | 0                | 5                 | 0               | 0     | 10    |
| Brasschaat       | Personalized | 6            | 4           | 0            | 0                | 0                 | 0               | 0     | 4     |
| Essen            | Control      | 20           | 325         | 115          | 66               | 32                | 15              | 6     | 559   |
| Essen            | Personalized | 32           | 352         | 100          | 53               | 95                | 63              | 8     | 671   |
| Kapellen         | Control      | 14           | 2           | 3            | 10               | 6                 | 3               | 0     | 24    |
| Kapellen         | Personalized | 11           | 11          | 7            | 0                | 21                | 19              | 0     | 58    |
| Kapellen         | N.A.         | 1            | 0           | 0            | 0                | 0                 | 0               | 0     | 0     |
| Schoten          | Control      | 2            | 0           | 0            | 3                | 0                 | 5               | 0     | 8     |
| Schoten          | Personalized | 1            | 0           | 0            | 0                | 0                 | 0               | 0     | 0     |
| Stabroek         | Control      | 9            | 0           | 0            | 0                | 0                 | 0               | 0     | 0     |
| Stabroek         | Personalized | 14           | 0           | 0            | 0                | 0                 | 0               | 0     | 0     |
| Wuustwezel       | Control      | 28           | 105         | 55           | 62               | 70                | 22              | 14    | 328   |
| Wuustwezel       | Personalized | 19           | 213         | 100          | 5                | 55                | 22              | 4     | 399   |
| Wuustwezel       | N.A.         | 1            | 0           | 0            | 0                | 0                 | 0               | 0     | 0     |
| Sport Vlaanderen | Control      | 2            | 0           | 0            | 0                | 0                 | 0               | 0     | 0     |
| Sport Vlaanderen | Personalized | 1            | 0           | 0            | 0                | 0                 | 0               | 0     | 0     |
| Sport Vlaanderen | N.A.         | 8            | 0           | 0            | 0                | 0                 | 0               | 0     | 0     |
